# Supplementary material for: Microbially-Mediated Phenolic Catabolites Exert Differential Geno-Protective Activities in Normal and Adenocarcinoma Cell Lines
Source: Preprints.org preprint supplement (doi:10.20944/preprints202308.0755.v1), 2023-08-09
Supplement: Supplementary file 1 [file supplementary]

**Microbially-mediated phenolic catabolites exert differential geno-protective activities in normal and adenocarcinoma cell lines.**

BrianÓg Murphy1, Cheryl Latimer1, Sara Dobani1, L. Kirsty Pourshahidi1, Massimilano Fontana1, Nigel. G. Ternan1, Gordon McDougall2, Ian Rowland3, Gema Pereira-Caro4, Kieran M. Tuohy5, Daniele Del Rio6, Tahani M. Almutairi7, Alan Crozier7,8, Chris I. R. Gill1

1Nutrition Innovation Centre for Food and Health (NICHE), Ulster University, Coleraine, United Kingdom

2Environmental and Biochemical Sciences Department, The James Hutton Institute, Invergowrie, Dundee, United Kingdom.

3Department of Food and Nutritional Sciences, University of Reading, Reading, United Kingdom.

4Department of Food Science and Health, IFAPA-Alameda Del Obispo, Córdoba, Spain. 5School of Food Science and Nutrition, University of Leeds, Leeds, United Kingdom.

6Human Nutrition Unit, Department of Food and Drug, University of Parma, Parma, Italy. 7Department of Chemistry, King Saud University Riyadh, Saudi Arabia;

8School of Medicine, Dentistry and Nursing, University of Glasgow, Glasgow, United Kingdom

**Contact**

Chris I.R. Gill

E-mail: c.gill@ulster.ac.uk

Nutrition Innovation Centre for Food and Health (NICHE), Ulster University, Coleraine, United Kingdom.

**Supplementary Materials:**

| **Supplementary table 1**: Comparison of geno-protective effects and gene expression in CCD 841 CoN and HT29 cells treated with either 10 μM, 50 μM or 100 μM individual phenolic; Benzoic acid (BA), 4-hydroxybenzoic acid (4HBA), 3-(3′-hydroxyphenyl)propanoic acid (3'HPPA), and 3-(phenyl)propanoic acid (3PPA). | | | | | | | | | | | | | | | | | |
| --- | --- | --- | --- | --- | --- | --- | --- | --- | --- | --- | --- | --- | --- | --- | --- | --- | --- |
|  | **CCD841 CoN Cells** | | | | | | | |  | **HT29 Cells** | | | | | | | |
|  | ***% Tail DNA*** | | ***Nrf2*** | | ***NQO1*** | | ***HO-1*** | |  | ***% Tail DNA*** | | ***Nrf2*** | | ***NQO1*** | | ***HO-1*** | |
| **BA** |  |  |  |  |  |  |  |  |  |  |  |  |  |  |  |  |  |
| *Untreated* | 49.95 ± 1.38 | a | 1.00 ± 0.00 | a | 1.00 ± 0.00 | a | 1.00 ± 0.00 | a |  | 50.81 ± 1.33 | a | 1.00 ± 0.00 | a | 1.00 ± 0.00 | a | 1.00 ± 0.00 | a |
| *10 µM* | 40.34 ± 2.40 | bxy | 1.48 ± 0.07 | abx§ | 1.40 ± 0.22 | abxy | 1.44 ± 0.11 | abx |  | 43.39 ± 2.00 | aw | 1.12 ± 0.03 | abw§ | 1.33 ± 0.22 | abw | 1.50 ± 0.10 | bw |
| *50 µM* | 34.95 ± 0.48 | bxyz | 1.89 ± 0.15 | bx | 2.07 ± 0.20 | bcx | 1.71 ± 0.10 | bx |  | 34.80 ± 2.68 | bw | 1.51 ± 0.07 | bw | 1.64 ± 0.10 | bw | 1.59 ± 0.07 | bwyz |
| *100 µM* | 24.58 ± 1.26 | cx | 2.29 ± 0.22 | bx | 2.44 ± 0.14 | cxy | 2.13 ± 0.10 | cx§ |  | 26.88 ± 0.69 | bw | 2.27 ± 0.15 | cw | 2.52 ± 0.19 | cw | 3.07 ± 0.17 | cw§ |
| **4HBA** |  |  |  |  |  |  |  |  |  |  |  |  |  |  |  |  |  |
| *Untreated* | 49.95 ± 1.38 | a | 1.00 ± 0.00 | a | 1.00 ± 0.00 | a | 1.00 ± 0.00 | a |  | 49.87 ± 0.19 | a | 1.00 ± 0.00 | a | 1.00 ± 0.00 | a | 1.00 ± 0.00 | a |
| *10 µM* | 31.83 ± 2.09 | bx§ | 1.99 ± 0.14 | bx | 1.20 ± 0.22 | abx§ | 1.61 ± 0.07 | bx |  | 29.87 ± 3.00 | bx§ | 2.48 ± 0.22 | bx | 1.89 ± 0.22 | bw§ | 2.32 ± 0.46 | bcw |
| *50 µM* | 32.01 ± 2.13 | bxy | 2.08 ± 0.10 | bx | 1.49 ± 0.10 | bx | 1.93 ± 0.17 | bx§ |  | 32.24 ± 2.48 | bw | 1.83 ± 0.08 | cwx | 1.91 ± 0.19 | bwx | 3.17 ± 0.15 | bx§ |
| *100 µM* | 25.07 ± 1.58 | bx§ | 2.57 ± 0.28 | bx§ | 1.51 ± 0.15 | bx§ | 2.07 ± 0.13 | bx |  | 31.70 ± 0.56 | bw§ | 1.48 ± 0.11 | acx§ | -1.43 ± 0.18 | cx§ | 2.01 ± 0.12 | cx |
| **3PPA** |  |  |  |  |  |  |  |  |  |  |  |  |  |  |  |  |  |
| *Untreated* | 49.63 ± 0.82 | a | 1.00 ± 0.00 | a | 1.00 ± 0.00 | a | 1.00 ± 0.00 | a |  | 50.08 ± 0.89 | a | 1.00 ± 0.00 | a | 1.00 ± 0.00 | a | 1.00 ± 0.00 | a |
| *10 µM* | 48.05 ± 1.40 | ay | 1.37 ± 0.16 | ax§ | 1.23 ± 0.22 | aby§ | 1.30 ± 0.04 | ax§ |  | 48.43 ± 1.42 | bw | -1.48 ± 0.05 | by§ | -1.35 ± 0.22 | bx§ | -1.30 ± 0.03 | bx§ |
| *50 µM* | 30.02 ± 0.86 | by | 1.93 ± 0.10 | bx | 1.66 ± 0.14 | bcx | 1.87 ± 0.07 | bx |  | 32.23 ± 0.61 | cw | 1.71 ± 0.06 | cwx | 1.96 ± 0.05 | cx | 2.04 ± 0.12 | cy |
| *100 µM* | 24.67 ± 2.48 | bx§ | 2.05 ± 0.16 | bx§ | 2.40 ± 0.32 | cxy§ | 2.17 ± 0.10 | bx§ |  | 50.06 ± 1.54 | by§ | -1.64 ± 0.03 | by§ | -1.30 ± 0.03 | bx§ | -1.46 ± 0.09 | by§ |
| **3'HPPA** |  |  |  |  |  |  |  |  |  |  |  |  |  |  |  |  |  |
| *Untreated* | 49.63 ± 0.82 | a | 1.00 ± 0.00 | a | 1.00 ± 0.00 | a | 1.00 ± 0.00 | a |  | 50.08 ± 0.89 | a | 1.00 ± 0.00 | a | 1.00 ± 0.00 | a | 1.00 ± 0.00 | a |
| *10 µM* | 42.01 ± 1.73 | bxy | 1.54 ± 0.33 | ax | 1.35 ± 0.22 | aby | 1.32 ± 0.17 | abx |  | 43.31 ± 1.03 | bw | 1.73 ± 0.09 | bz | 2.46 ± 0.22 | bw | 1.65 ± 0.18 | bw |
| *50 µM* | 39.91 ± 1.35 | bcz | 1.79 ± 0.18 | abx | 1.54 ± 0.12 | bx | 1.62 ± 0.09 | bx |  | 34.36 ± 1.86 | cw | 2.15 ± 0.24 | bx | 1.41 ± 0.07 | abw | 1.39 ± 0.07 | cz |
| *100 µM* | 22.49 ± 1.78 | cx§ | 2.26 ± 0.07 | bx§ | 3.00 ± 0.50 | cy§ | 2.28 ± 0.13 | cx§ |  | 39.34 ± 1.09 | bcx§ | 1.50 ± 0.25 | abx§ | 1.19 ± 0.11 | ay§ | 1.12 ± 0.05 | acz§ |
| *Data is presented as the mean of 3 independent experiments ± SEM. A One-way ANOVA with Dunnett’s and Tukey’s post hoc tests were used to determine significance of concentration effects within compound compared to the untreated control and other concentrations. A One-way ANOVA with Tukey's Multiple Comparisons post hoc test was used to assess significance of concentration effects between compounds. An unpaired T-test was used to compare differences in effects between cell types.*  ***Within column****, when comparing concentration effects* ***within compound****, a value with a different superscript letter (abc) denotes a significance from control.*  ***Within column****, when comparing concentrations effects* ***between compounds*** *a value with a different subscript letter (wxyz) denote significance.*  ***Within row****, when comparing effects* ***between cell types*** *a superscript symbol (*§) *denotes significance. Significance accepted at p<0.05.* | | | | | | | | | | | | | | | | | |
